# Supplementary material
Source: publisher figshare collection journal article supplement (https://tandf.figshare.com/ndownloader/files/13817021)
Supplement: Supplementary file 1 [file 13817021]

| **Distribution of the 221 AUs across 3 zones** | | |
| --- | --- | --- |
| **Zone 1**  **75** | **Zone 2**  **71** | **Zone 3**  **75** |

**3 urban zones in Sari city**

**Distribution of the 221 AUs across 3 urban zones**

**Made up of 221 Administrative Units (AUs/clusters)**

**Selecting 12 women from each random AU**

| **# Randomly selected AUs from each zone** | | |
| --- | --- | --- |
| **Zone 1**  **43** | **Zone 2**  **39** | **Zone 3**  **43** |

| **% distribution of total women 40-64 years in zones 1-3 (total 31144)** | | |
| --- | --- | --- |
| **10325** | **10433** | **10386** |

**Figure 1 Study cluster sampling procedures**
